# Supplementary material for: Types of knowledge and diversity of business-academia collaborations: implications for measurement and policy
Source: Springer Nature journal article supplement (doi:10.1186/s40604-015-0023-4), 2015-07-22
Supplement: MOESM1 [file 11901862]

Attila Havas

## Types of knowledge and diversity of business-academia collaborations: implications for measurement and policy

### أنواع المعرفة وتنوع التعاون بين الجامعة وعالم الأعمال : الآثار المترتبة على السياسة و الإجراءات

يعتمد عادة تحليل التعاون في الأعمال الأكاديمية على أسلوب واحد والمتمثل في طرح سؤال رئيسي أو اثنين للبحث. خلافا لذلك، يتناول هذا المقال أوجه التعاون بين البحث والتطوير من جهة والابتكار من جهة أخرى في أوساط الأعمال التجارية و الأكاديمية بالاعتماد على المعلومات واستخدام أساليب ومصادر متعددة لها وذلك لتقديم رؤى حول الديناميكيات والخصائص النوعية لنظم هذا التعاون.

أكدت المقابلات التي أجريت في هنغاريا-اون لين و نتائج البحوث الأخرى على ان (I) الدوافع والحوافز والقواعد للقيام بأنشطة البحث والتطوير والابتكار تختلف كليا بين اوساط الأعمال التجارية من جهة و الأكاديمية من جهة أخرى (II) الشركات المختلفة لديها احتياجات مختلفة. لذلك، يجب وضع سياسة ذات اجراءات متطورة لتعزيز دفع التعاون بين الجامعة وعالم الاعمال وتلبية احتياجات الفاعلين بالاعتماد على تصنيف دقيق لنظم التعاون. كما يجب مراجعة معايير التقييم الأكاديمي لإزالة بعض العقبات الرئيسية التي تعرقل حاليا التعاون المثمر بين الجامعة وعالم الأعمال.

يمكن تعميم العديد من النتائج التي تتجاوز الحالات التي وقع اعتمادها في الدراسة مما يشير إلى الحاجة إلى فهم أعمق لدور الوسطاء في منظومة "المراوح الثلاثة" وإجراء تحليل مقارن لسياسات الابتكار على نطاق أوسع. يجب ان يأخذ تصور الابحاث التي تعنى بتحليل التعاون بين الجامعة وعالم الأعمال بعين الاعتبار منظومة الابتكار موضوع الدرس وتوصيات السياسات ذات الصلة .
